# Supplementary material
Source: publisher site journal article supplement (https://www.dovepress.com/article/322637)
Supplement: Supplementary file 1 [file get_supplementary_file.php]

***APPENDIX I***

**Poisson Heterogeneity: Derivations**

It is known that the conjugate prior for the Poisson distribution is gamma, whose pdf is

, (1)

with an average. and variability , where the parametersand are recognized as *hyper-parameters* (Rajan and Shanmugam, 2020). Notice that the hyper parametercauses the variability in the COVID-19’s prevalence rate to fluctuate up or down and hence, one would anticipate the heterogeneity to involve the hyperparameter.

(2)

is the posterior pdf of the non-observable. Also, the denominator

,

in a Bayesian framework, is called the *marginal distribution*. With, it is clear that,

note that the prior variance is

.

Because the prior is conjugate, its counterpart’s variability

is minimal when the Bayes estimate of the non-observable is the posterior mean,

,

where

.

Differentiating the log-likelihood function

with respect to the non-observable parameter,, setting it equal to zero and solving it, we obtain the MLE, and it is. Because of the invariance property of the MLE, it is involved. The invariance property refers to that the MLE of a function of the parameter is the function of the MLE of the parameter. Also, it is known (Blumenfeld, 2010) that

and

. (3)

Hence, we are ready now to define the non-observable heterogeneity below in the Definition 1.

*Definition 1.* The non-observable heterogeneity of the Poisson parameter,is defined as

. (4)

Following the Definition 1, we obtain the *non-observable heterogeneity* of the COVID-19 cases is

(5)

When the value of is closer to zero, the data are believed to have non-observable Poisson homogeneity. Its MLE is

. (6)

The reader is referred to Figure 1 for the configuration of the non-observable Poisson heterogeneity in general.

Likewise, the *observable-heterogeneity* is defined below in Definition 2.

*Definition2.* The observable heterogeneity of the randomly sampled Poisson counts, is defined as

. (7)

Before we apply the Definition 2, let us recollect that the marginal pdf of the complete sufficient statistic, is uniform distribution and the posterior distribution is

with

(8)

and

. (9)

Imposing the Definition 2 and simplifying, we obtain thatwhose MLE is

. (10)

The reader is referred to Figure 2 for the configuration of the observable Poisson heterogeneity,in general. When the value ofis closer to zero, the data are interpreted to have observable homogeneity.

Furthermore, the distance, between the observableof the number of COVID-19 cases and the prevalence rate could be assessed using the formula

. (11)

Realizing that their absolute difference is really , we obtain after simplifications that

. (12)

The configuration of the distance, between the observable and non-observable in Poisson mechanism. We now turn to discuss stochastic properties of the Poisson distribution are given in Figure 3.

The survival function of the random number, of COVID-19 cases is

(13)

The hazard rate is a force of mortality. The hazard rate, for the COVID-19 occurrence is

. (14)

Does the Poisson chance mechanism keep any a finite *memory?* For example, the geometric distribution is known to have no memory. What is memory? The memory is really a conditional probability. That is,

, (15)

confirming that there is a finite memory in the Poisson mechanism of COVID-19 incidences. To be specific, within the above result, the memory between COVID-19 free situation and just one COVID-19 occurrence is revealed in the chance-oriented Poisson mechanism. Such a memory is

. (16)

Likewise, the memory between at least one COVID-19 case situation and at least two COVID-19 cases situation is revealed with a substitution of in the above result and it is

. (17)

The odds ratio from the initial to the nextis

(18)

(Their values in Table 1). However, the odds for COVID-19 free healthy situation to prevail is

(19)

(their values in Table 1). For details on how the chance for an incidence of a disease to occur from a disease-free scenario changes, the reader is referred to Shanmugam and Radhakrishnan (2011).

**Binomial Heterogeneity: Derivations**

Let an indicator random variable,for a COVID-19 person to show asymptomatic symptom with a probability,andto show symptomatic symptom with a probability, . Then, for a fixed, the random variable,follows a binomial probability distribution with parameters. Likewise, for a fixed, the random variable,follows a complementary binomial distribution with parameters.That is,

(20)

and

(21)

with their conditional expected numbers

(22)

and the conditional variabilities

, (23)

and

. (24)

The conditional variability ofis a percentof its expected number, implying that it exhibits under dispersion. Likewise, the conditional variability ofis a percentof its expected numberimplying that it also exhibits under dispersion. Together, the above statements suggest a conditional balance

(25)

(Stuart and Ord, 2015 for details of the odds concepts). Consequently, we note that

. (26)

Furthermore, we wonder whether the random variablesandare correlated? The answer is affirmative. To identify their correlation, notice that

,

where

,,

.

Hence, their correlation is

. (27)

Their expected distance, portrays the drift between the symptomatic observable,and the asymptomatic observable, and it is simplified to this function (see Table 3 for their values), due to applying

.

Let us assume that every COVID-19 case has the same chance of being asymptomatic in a time period. Then, the random number,for a specified number,of COVID-19 cases follows a binomial distribution with parameters. We select a conjugate beta prior distribution

(28)

for our discussion for asymptomatic COVID-19 cases. The prior average is

and the prior variability is

,

where the parametersandare hyper-parameters (Rajan and Shanmugam, 2020, for detail). We guess that the binomial heterogeneity would involve both hyperparameters. The task for us is how do we construct such heterogeneity? An answer is the following. The posterior distribution

(29)

would play a key role to construct both the observable and non-observable binomial heterogeneity. With, it is clear that.

The prior variance is

.

Its posterior counterpart

is minimal when the Bayes estimate of non-observable is the posterior mean

,

where

. (30)

The posterior variance is

. (31)

Differentiating the log-likelihood function as

with respect to the non-observable parameter,, setting it equal to zero and solving it, we obtain the ML, and it isIt is known that

(32)

and

. (33)

Hence, we define the non-observable binomial heterogeneity below in Definition 3.

*Definition 3.* The non-observable binomial heterogeneity is defined as

. (34)

Following the Definition 3, we obtain the *non-observable heterogeneity* of the COVID-19’s asymptotic cases (remembering thatare the non-observable parameters) as

. (35)

When the value of is closer to zero, the data are interpreted to have non-observable binomial homogeneity. Substituting the MLEs

and , (36)

we obtain its MLE

. (37)

Likewise, the *observable-heterogeneity* of the binomial distribution ofis defined below in Definition 4.

*Definition 4.* The observable heterogeneity of the binomial counts,(in terms of the complete sufficient statistic) is defined as

. (38)

Before we apply Definition 4, remember that the marginal pdf of the complete sufficient statistic,is the beta-binomial distribution,

(39)

and the posterior distribution is beta. With the notation , we note that the probability mass function of the beta-binomial distribution is

. (40)

That is, the posterior probability density function is

(41)

with

(42)

and

. (43)

Now applying Definition 4, we obtain an expression for the observable binomial heterogeneity

,

(44)

whose estimate is

*,* (45)

*Because*

and . (46)

When the value ofis closer to zero, the data are considered to have observable binomial homogeneity. Also, the distance, between the observableof the number of asymptomatic COVID-19 cases and its proportion,could be assessed using the formula

. (47)

Realizing that the absolute difference,, we obtain after simplifications that

. (48)

Likewise, to obtain the *non-observable heterogeneity* of the COVID-19’s symptomatic cases, all we have to do is changeto, changeto, along with changingtoand go through the process above. Hence, the non-observable heterogeneity in the symptomatic cases is the same. That is,

. (49)

The observable binomial heterogeneity for the symptomatic cases is

, (50)

whose MLE is

, (51)

which is interestingly not the same as. Also, the distance, between the observableof the number of asymptomatic COVID-19’s symptomatic cases and the proportion, could be assessed using the formula

(52)

and it is after simplifications that

. (53)

Now we explore statistical properties of the asymptomatic cases,. The survival function of the random number, with asymptotic symptoms is as follows:

(54)

The hazard rate,of the binomial distribution for the asymptomatic cases is

(55)

The binomial distribution has a finite *memory expressed as*

. (56)

confirming that the usual binomial distribution does possess a finite memory. The conditional odds, for a fixed, for *safe* asymptomatic symptom is as follows:

. (57)

The unconditional odds for safe asymptotic symptom given by:

(58)

The reader is referred to Figure 4 for the configuration of the odds in asymptotic COVID-19 occurrences in general.

Recall that is the likelihood for the existence of asymptomatic symptom of COVID-19 in the ship. The hazard in that situation (that is, with ) is

, (59)

where . A popular statistical concept in the business world (Khokhlov, 2016 for details), *Tail Value at Risk* (Tar) is

. (60)

Similarly, all the Bayesian results for the binomial random variable,are easily derivable by interchangingandin all above expressions. The survival function of the random number, with symptomatic symptoms is

(61)

The hazard rate,for the symptomatic sign is given by

(62)

The binomial distribution of those with symptomatic signs has a finite *memory*

, (63)

confirming that the usual binomial probability trend of those with symptomatic signs does possess a finite memory. The conditional odds, for a fixed, for *safe* symptomatic symptom are

. (64)

The unconditional odds for safe symptomatic symptom are

. (65)

A comparison of andsuggests the odds ratio,

. (66)

See Figure 5 for the configuration of the isomorphic factor,.

Recall that is the chance for the existence of symptomatic symptom of COVID-19. The hazard in that situation (that is, with ) is

, (67)

where . The *Tail Value at Risk* (TVaR) is

. (68)
